# Supplementary material for: Copper-containing porous carbon derived from MOF-199 for dibenzothiophene adsorption
Source: Royal Society of Chemistry journal article supplement (doi:10.1039/c7ra02946b), 2017-01-01
Supplement: c7ra02946b1.pdf [file c7ra02946b1.pdf]

*Supporting information for*

## **Copper-Containing Porous Carbon Derived from MOF-199 for Dibenzothiophene Adsorption**

Guihua Zhao,<sup>a</sup> Yaoyao Fang,<sup>a</sup> Wei Dai,<sup>\*,a</sup> and Na Ma<sup>b</sup>

<sup>a</sup>College of Chemistry and Life Science, Zhejiang Normal University, Zhejiang Province Jinhua 321004, People's Republic of China

<sup>b</sup>College of Geography and Environmental Science, Zhejiang Normal University, Zhejiang Province Jinhua 321004, People's Republic of China

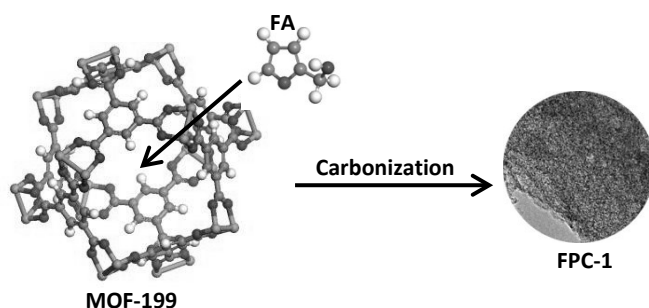

**Scheme S.I.1** Schematic procedure for porous carbon from MOF-199

**Figure captions:**

**Fig. S.I.1** Langmuir linear model of DBT on the FPC-1 in ALO, ARO and MIO, respectively.

**Fig. S.I.2** Freundlich linear model of DBT on the FPC-1 in ALO, ARO and MIO, respectively.

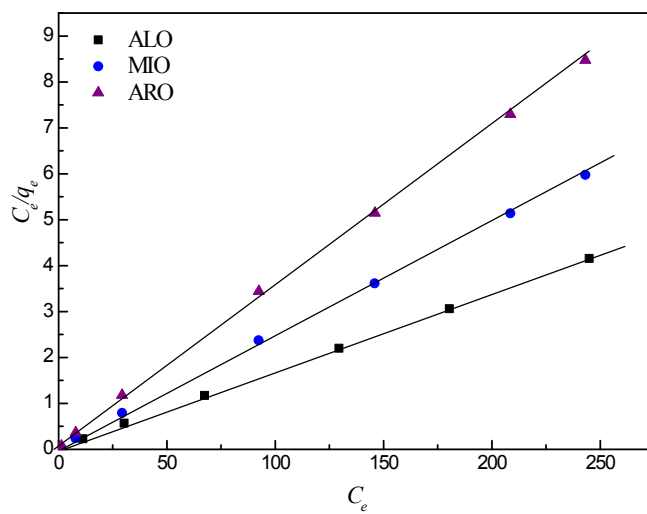

**Fig. S.I.1** Langmuir linear model of DBT on the FPC-1 in ALO, ARO and MIO, respectively.

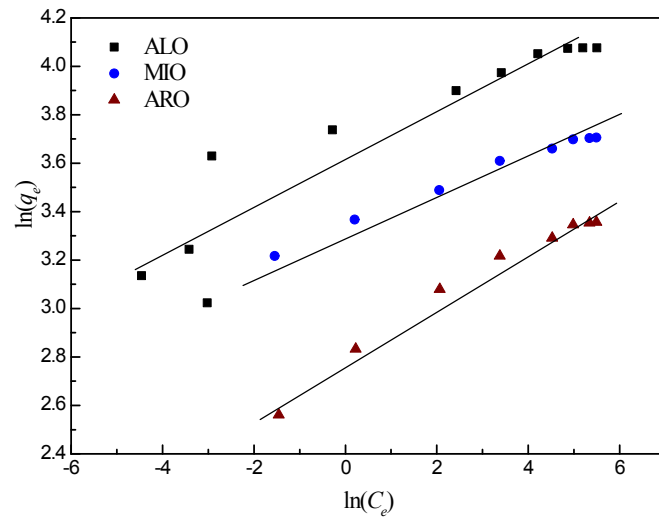

**Fig. S.I.2** Freundlich linear model of DBT on the FPC-1 in ALO, ARO and MIO, respectively.

**Table captions:****Table S.I.1** Comparison of sulfur adsorption capacity**Table S.I.2** Constants and correlation coefficients of Langmuir and Freundlich models.**Table S.I.1** Comparison of sulfur adsorption capacity

| Adsorbents                        | Solvents                    | $q_{max}$ ( $\mu\text{gS/g}$ ) | References |
|-----------------------------------|-----------------------------|--------------------------------|------------|
| FPC-1                             | ALO                         | 59.1                           | this work  |
| FPC-1                             | ARO                         | 28.9                           | this work  |
| FPC-1                             | MIO                         | 40.9                           | this work  |
| Activated carbon                  | n-octane                    | 28.9                           | [31]       |
| Cu(I)-Y zeolite                   | n-octane                    | 32.6                           | [32]       |
| Co-Y zeolite                      | n-octane                    | 29.4                           | [32]       |
| Ce/Ni-Y zeolite                   | n-octane                    | 22.2                           | [33]       |
| Activated $\text{Al}_2\text{O}_3$ | n-hexane                    | 21.0                           | [34]       |
| CMK-3                             | n-hexane                    | 10.9                           | [35]       |
| ZIF-8-derived                     | n-hexane                    | 26.7                           | [36]       |
| ZIF-8-derived                     | n-hexane: Para-xylene (9:1) | 22.2                           | [36]       |

\*All the sulfur uptake capacity is the content of sulfur element ( $\mu\text{gS/g}$ ).

**Table S.I.2** Constants and correlation coefficients of Langmuir and Freundlich models.

| Model oil | Langmuir     |             |        |       | Freundlich   |       |        |
|-----------|--------------|-------------|--------|-------|--------------|-------|--------|
|           | $q_L$ (mg/g) | $K_L$ (L/g) | $R^2$  | $R_L$ | $K_f$ (L/mg) | $1/n$ | $R^2$  |
| ALO       | 59.10        | 1.12        | 0.9999 | 0.427 | 37.34        | 0.097 | 0.9324 |
| ARO       | 28.87        | 0.78        | 0.9997 | 0.517 | 16.28        | 0.112 | 0.9883 |
| MIO       | 40.87        | 0.55        | 0.9998 | 0.602 | 28.22        | 0.069 | 0.9957 |
